# Supplementary material for: Iron-saturated bovine lactoferrin: a promising chemopreventive agent for hepatocellular carcinoma
Source: Royal Society of Chemistry journal article supplement (doi:10.1039/d3fo05184f), 2024-01-01
Supplement: d3fo05184f1.pdf [file d3fo05184f1.pdf]

1 **Iron-saturated bovine lactoferrin: A promising chemopreventive agent for**  
2 **hepatocellular carcinoma**

3

4 **Supplementary Table 1. Effect of lactoferrin and sorafenib on HepG2 cells**  
5 **viability *in vitro*. Cytotoxicity and combination index (CI)**

| Treatment               | Doses                   | 24h                        | 48h                        | 72h                         |
|-------------------------|-------------------------|----------------------------|----------------------------|-----------------------------|
| Holo-bLf                | 50 $\mu$ M              | 5.5 % $\pm$ 0.16<br>ns     | 9.1 % $\pm$ 0.05<br>ns     | 11 % $\pm$ 0.02<br>ns       |
|                         | 100 $\mu$ M             | 17.5 % $\pm$ 0.07<br>*     | 24.72 % $\pm$ 0.06<br>***  | 24.28 % $\pm$ 0.18<br>****  |
|                         | 200 $\mu$ M             | 67.77 % $\pm$ 0.03<br>**** | 71.96 % $\pm$ 0.02<br>**** | 78.61 % $\pm$ 0.07<br>****  |
| Sorafenib               | 3 $\mu$ M               | 23.66 % $\pm$ 0.02<br>**   | 51.01 % $\pm$ 0.03<br>**** | 62.59 % $\pm$ 0.02<br>****  |
|                         | 5 $\mu$ M               | 38.23 % $\pm$ 0.03<br>**** | 83 % $\pm$ 0.01<br>****    | 90.75 % $\pm$ 0.01<br>****  |
|                         | 7 $\mu$ M               | 63.1 % $\pm$ 0.02<br>****  | 88.96 % $\pm$ 0.01<br>**** | 98.49 % $\pm$ 0.005<br>**** |
| Holo-bLf +<br>Sorafenib | 50 $\mu$ M<br>3 $\mu$ M | 33.03 % $\pm$ 0.05<br>**   | 91.44 % $\pm$ 0.03<br>**** | 98.79 % $\pm$ 0.005<br>**** |
| Combination<br>index    |                         | 1.17                       | 0.54                       | 0.41                        |

6

7 Cytotoxic effect = 100 - % of viability. Data represented as mean  $\pm$  SD, n = 3  
8 ANOVA and Tukey's multiple comparisons tests were performed, and significant  
9 differences were calculated compared with either the control group or specific  
10 comparisons. (\*P<0.005, \*\*P<0.005, \*\*\*P<0.005 y \*\*\*\*P<0.0001).
